# Supplementary material for: Hydroboration of imines: intermolecularvs.intramolecular hydride transfer
Source: Royal Society of Chemistry journal article supplement (doi:10.1039/d3nj01979a), 2023-01-01
Supplement: d3nj01979a1.pdf [file d3nj01979a1.pdf]

## Supporting Information

### Hydroboration of imines: Intermolecular vs. intramolecular hydride transfer

Siyuan Zhai<sup>a</sup>, Dragoslav Vidović<sup>a</sup> and Milena Petković<sup>b</sup>

<sup>a</sup>School of Chemistry, Monash University, Clayton, 2800 Australia

<sup>b</sup>University of Belgrade – Faculty of Physical Chemistry, Studentski trg 12-16, 11158 Belgrade, Serbia

#### Copies of selected NMR spectra:

Figure S1. <sup>1</sup>H NMR spectrum for **2b-d<sub>3</sub>**.

Figure S2. <sup>13</sup>C{<sup>1</sup>H} NMR spectrum for **2b-d<sub>3</sub>**.

Figure S3. <sup>11</sup>B NMR spectrum for **2b-d<sub>3</sub>**.

Figure S4. <sup>1</sup>H NMR spectrum for **2c-d<sub>3</sub>**.

Figure S5. <sup>13</sup>C{<sup>1</sup>H} NMR spectrum for **2c-d<sub>3</sub>**.

Figure S6. <sup>11</sup>B NMR spectrum for **2c-d<sub>3</sub>**.

Figure S7. <sup>1</sup>H NMR spectrum for **3b-d<sub>3</sub>**.

Figure S8. <sup>13</sup>C{<sup>1</sup>H} NMR spectrum for **3b-d<sub>3</sub>**.

Figure S9. <sup>11</sup>B NMR spectrum for **3b-d<sub>3</sub>**.

Figure S10. <sup>1</sup>H NMR spectrum for **3c-d<sub>3</sub>**.

Figure S11. <sup>13</sup>C{<sup>1</sup>H} NMR spectrum for **3c-d<sub>3</sub>**.

Figure S12. <sup>11</sup>B NMR spectrum for **3c-d<sub>3</sub>**.

Figure S13: Overlay of the reaction between **2b** and **2c-d<sub>3</sub>** and (a) with **3b** (b) and **3c** (c).

Figure S14. <sup>1</sup>H NMR of conversion of **2c** to **3c** under “open system”.

Figure S15. Studied imines (**1E**, top), transition states for alkyl group rotation (middle), and the corresponding rotamers (**1Z**, bottom).

Figure S16. Two transition states for a reaction between **2Eb** and **2Ec** (left and middle) and a transition state for a reaction between **2Zb** and **2Zc** (right).

Copies of selected NMR spectra:

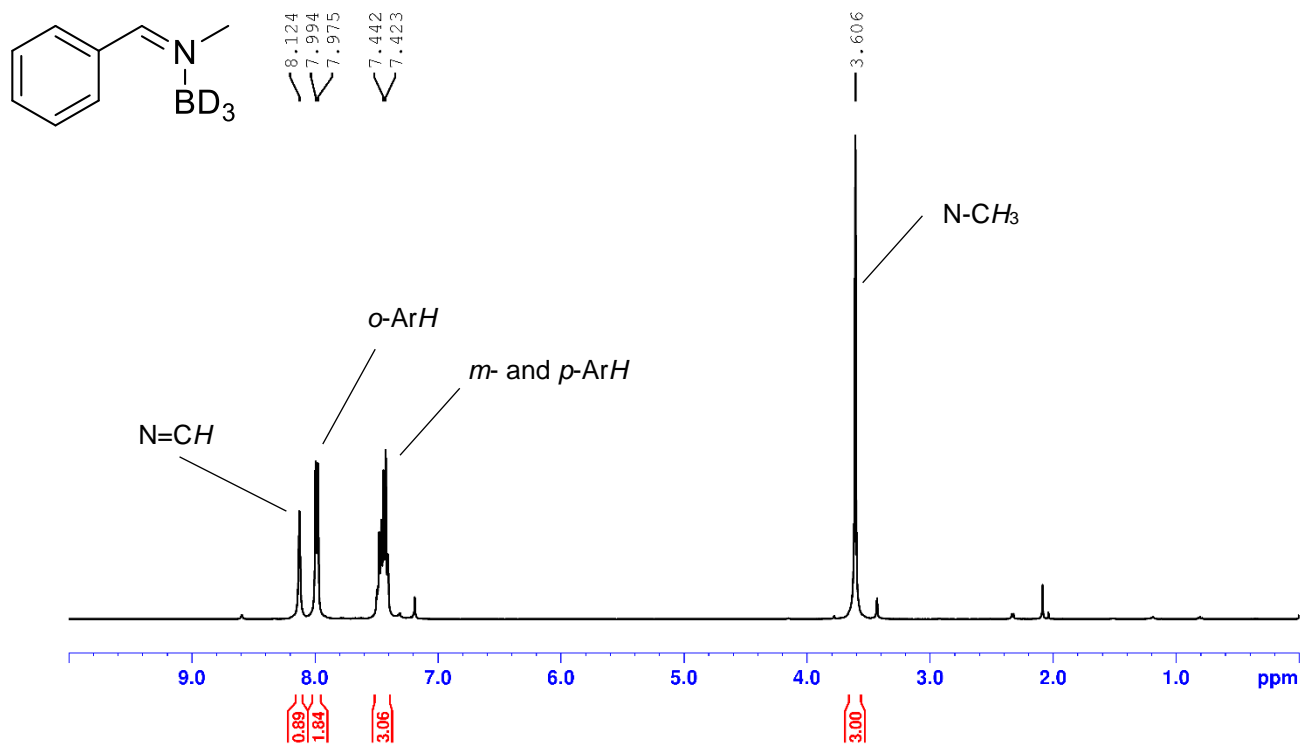

Figure S1. <sup>1</sup>H NMR spectrum for **2b-d<sub>3</sub>**.

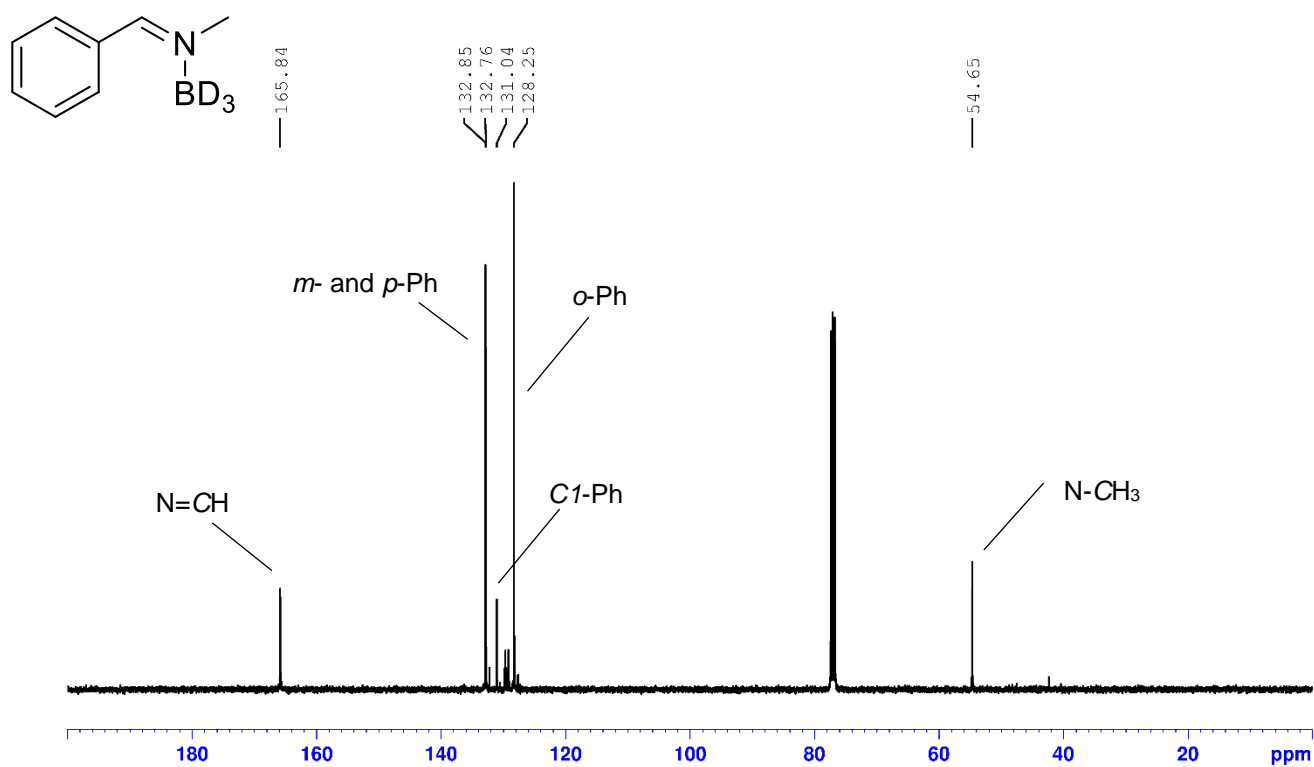

Figure S2. <sup>13</sup>C{<sup>1</sup>H} NMR spectrum for **2b-d<sub>3</sub>**.

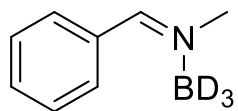

—16.58

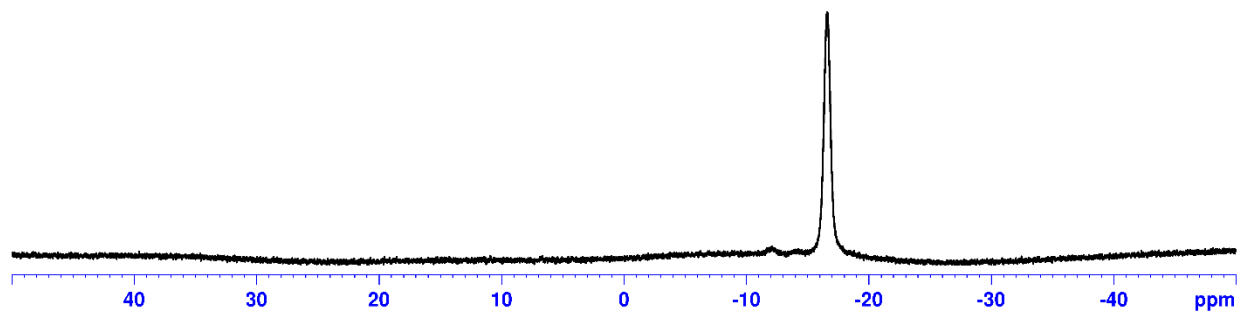

Figure S3.  $^{11}\text{B}$  NMR spectrum for **2b-d<sub>3</sub>**.

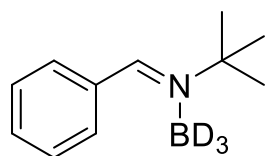

8.268  
8.026  
8.023  
8.008  
8.003  
7.424  
7.421

—1.524

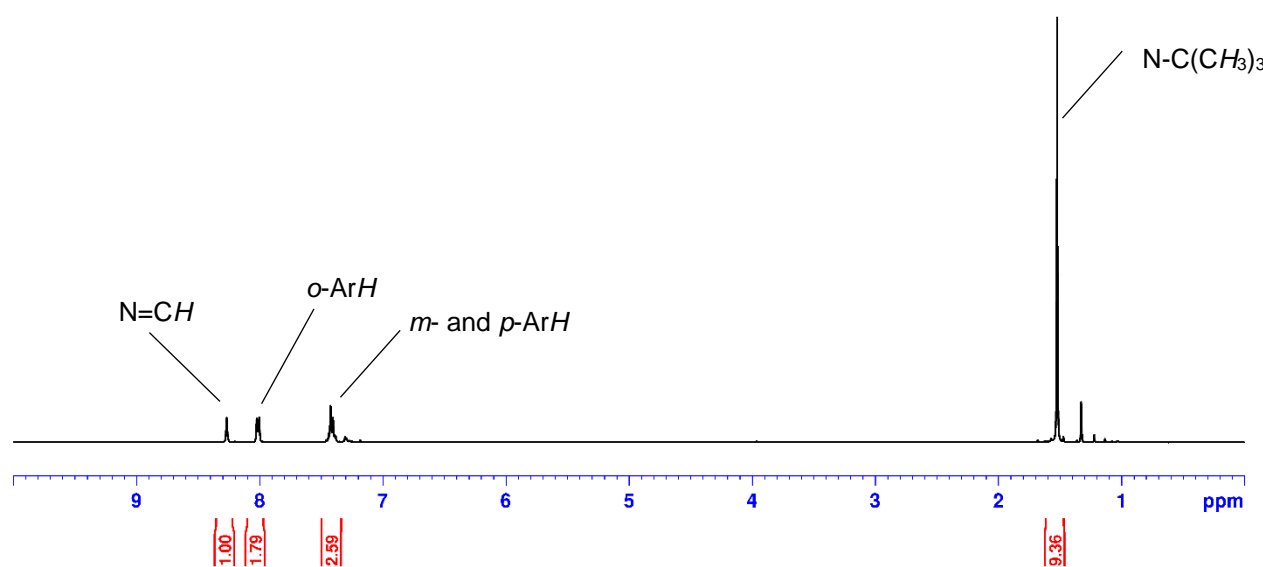

Figure S4.  $^1\text{H}$  NMR spectrum for **2c-d<sub>3</sub>**.

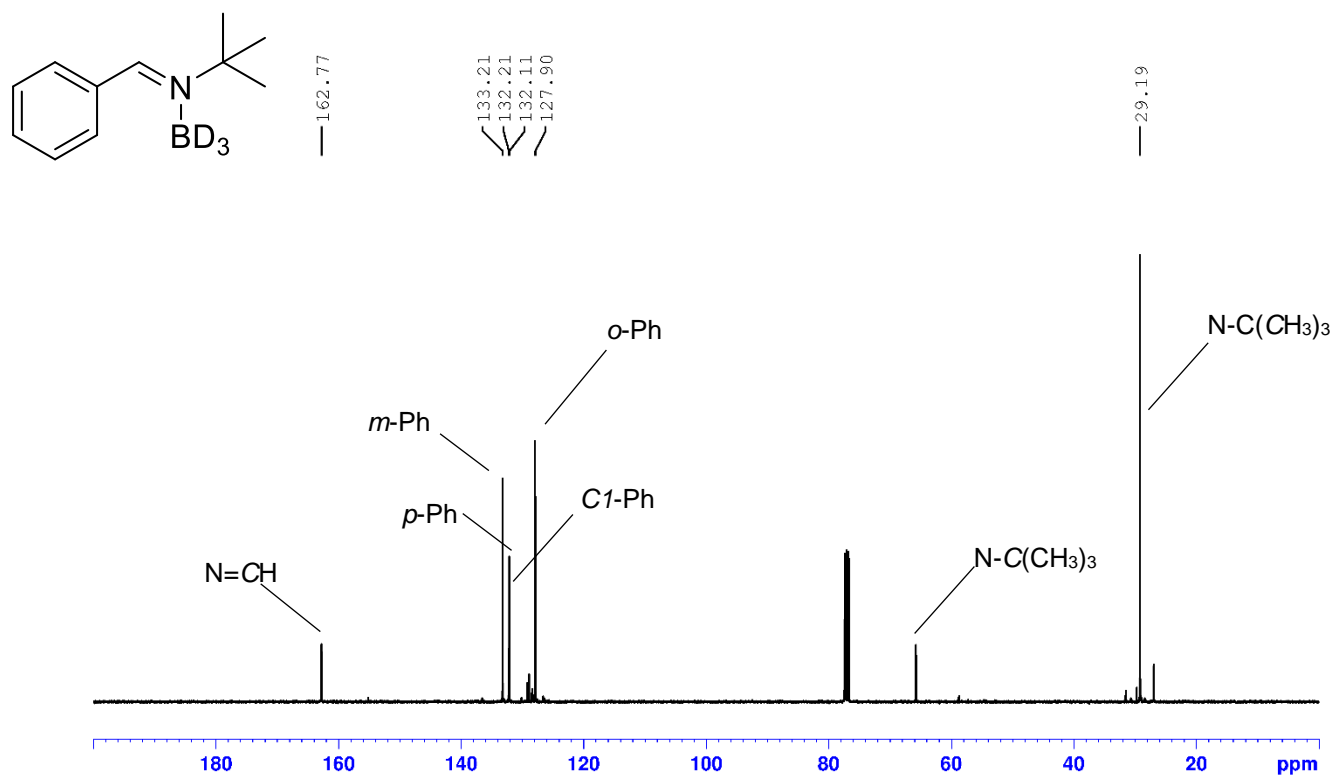

Figure S5. <sup>13</sup>C{<sup>1</sup>H} NMR spectrum for **2c-d<sub>3</sub>**.

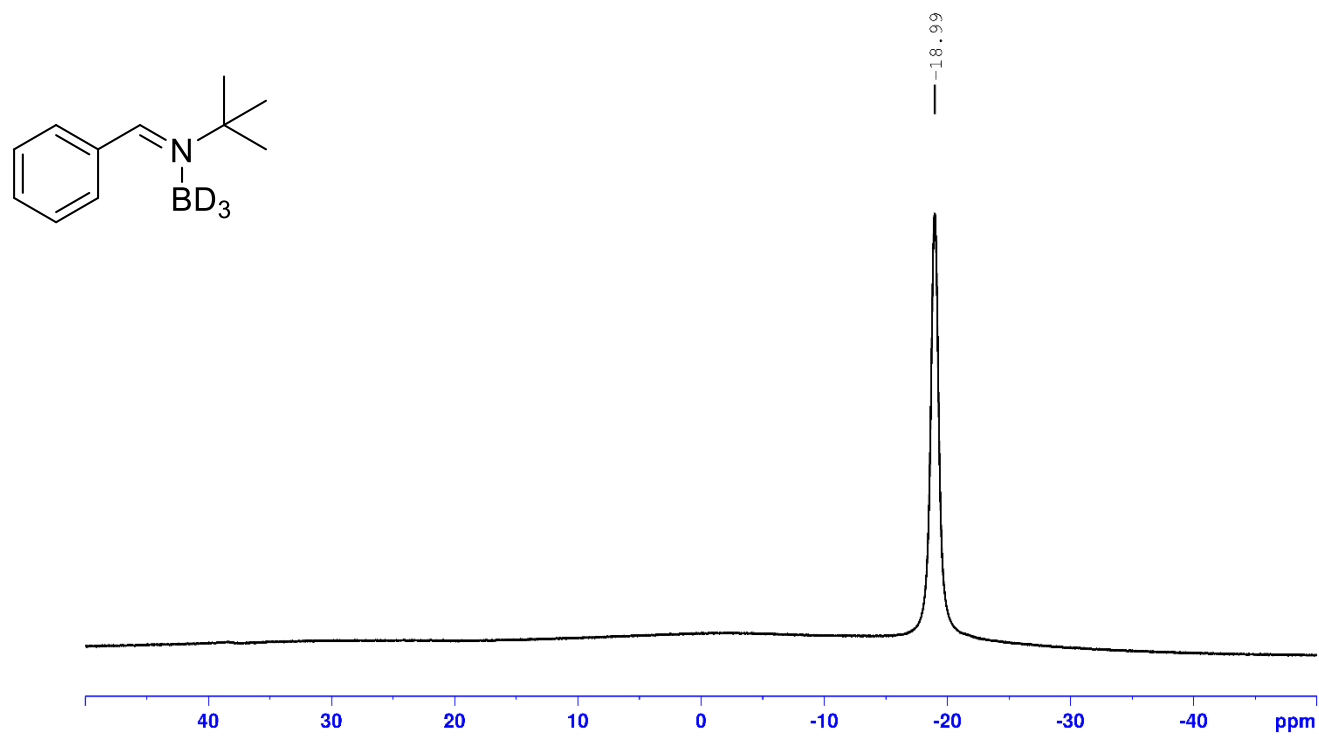

Figure S6. <sup>11</sup>B NMR spectrum for **2c-d<sub>3</sub>**.

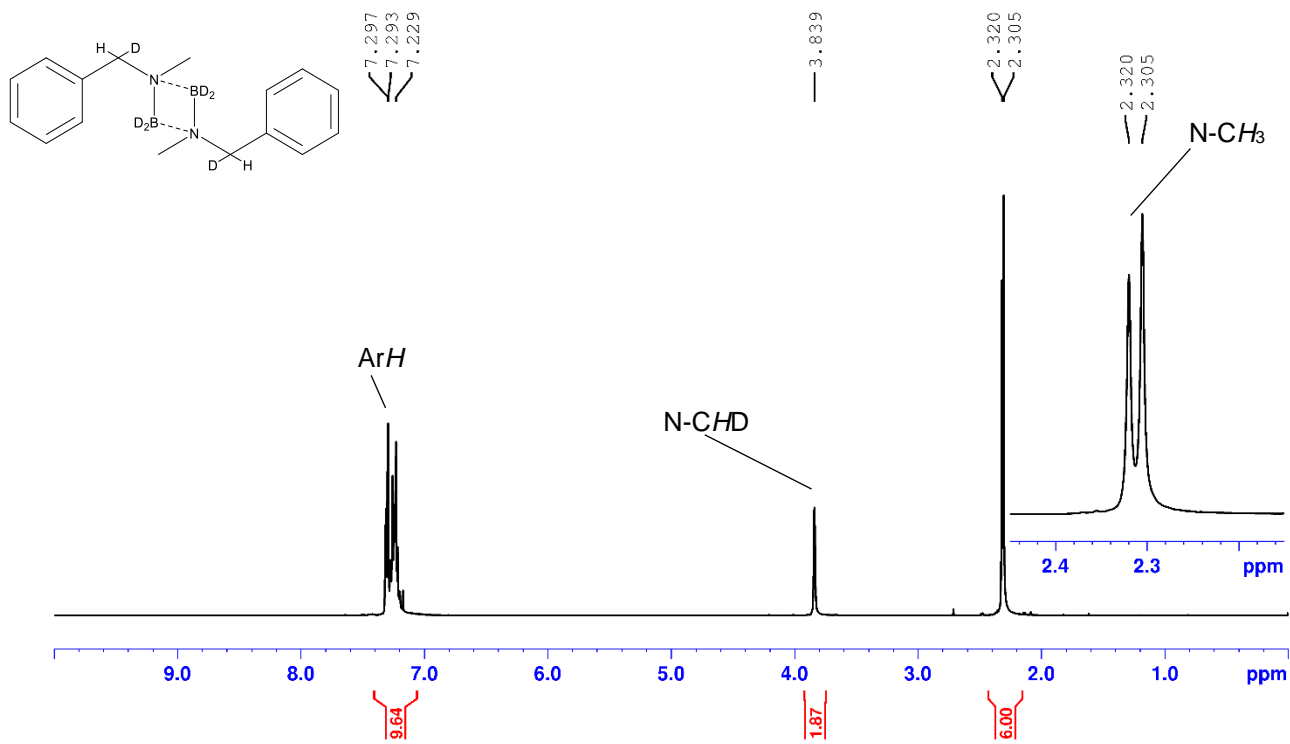

Figure S7. <sup>1</sup>H NMR spectrum for **3b-d<sub>3</sub>**.

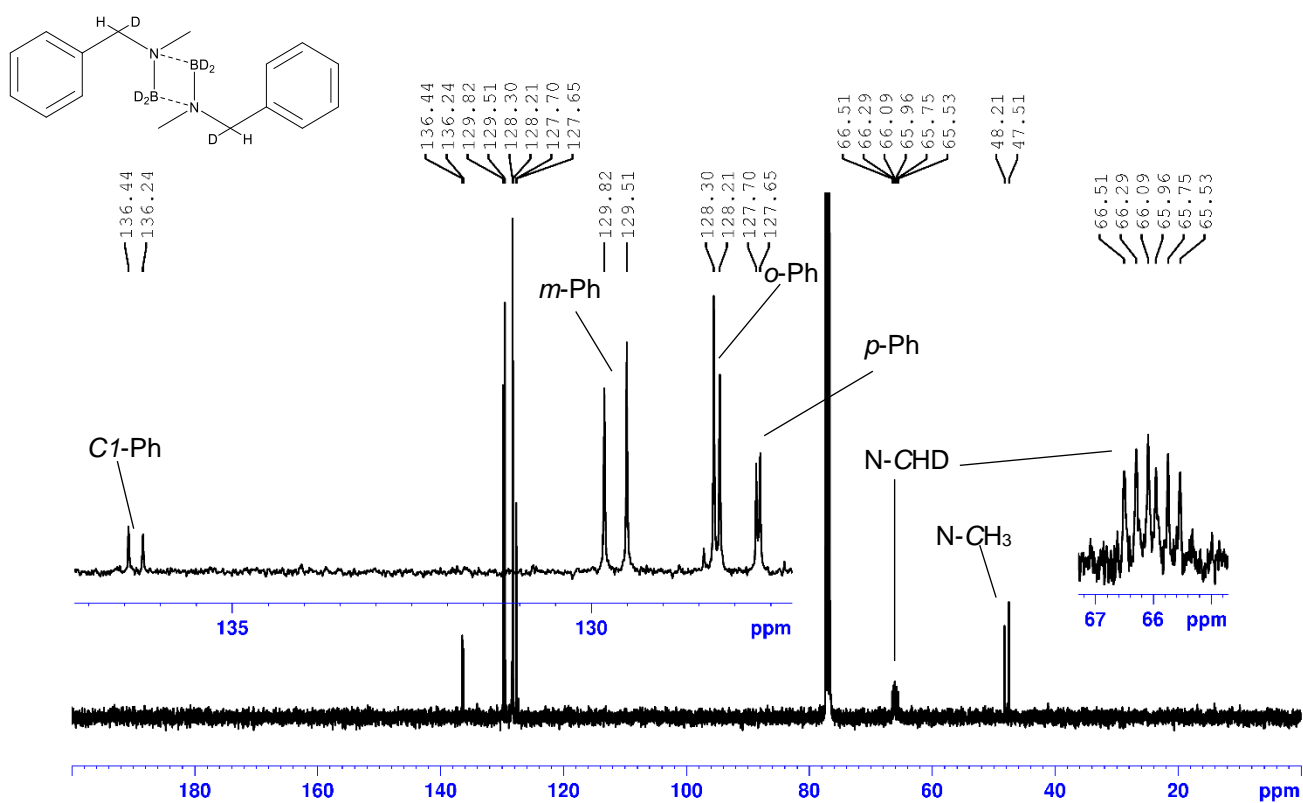

Figure S8. <sup>13</sup>C{<sup>1</sup>H} NMR spectrum for **3b-d<sub>3</sub>**.

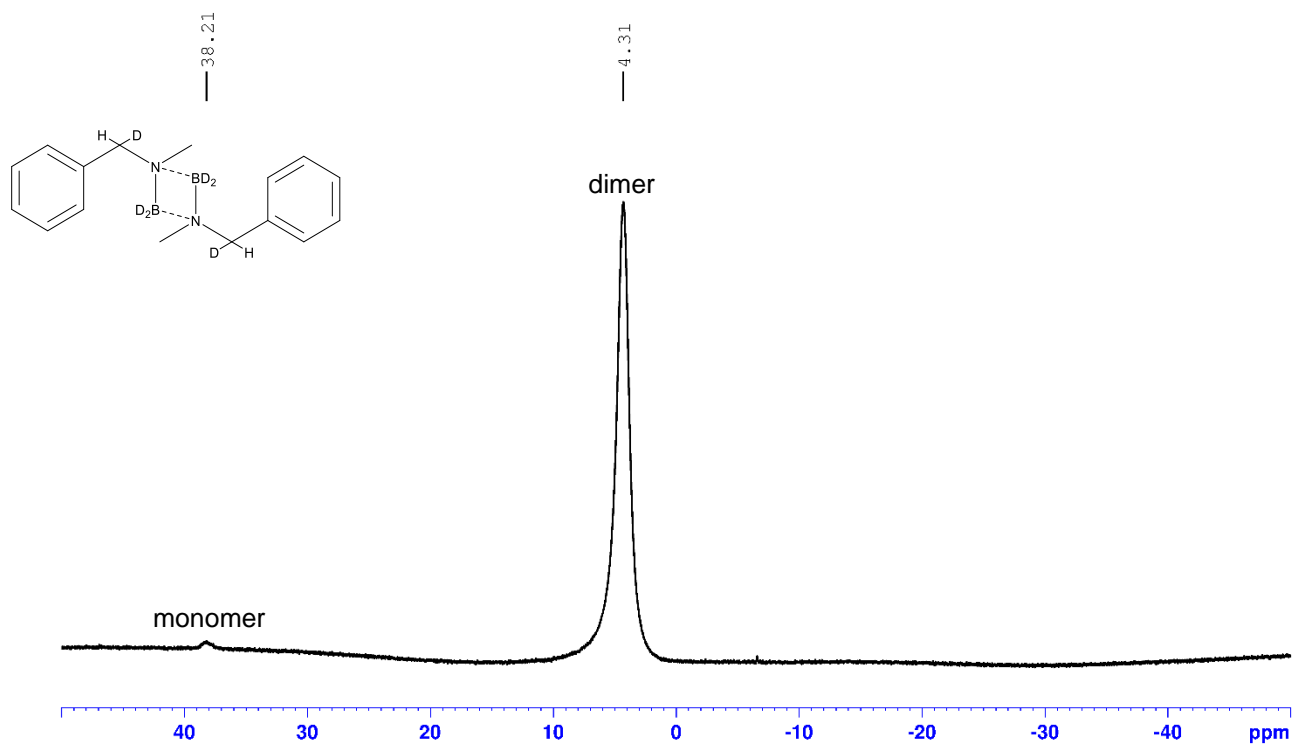

Figure S9.  $^{11}\text{B}$  NMR spectrum for **3b-d<sub>3</sub>**.

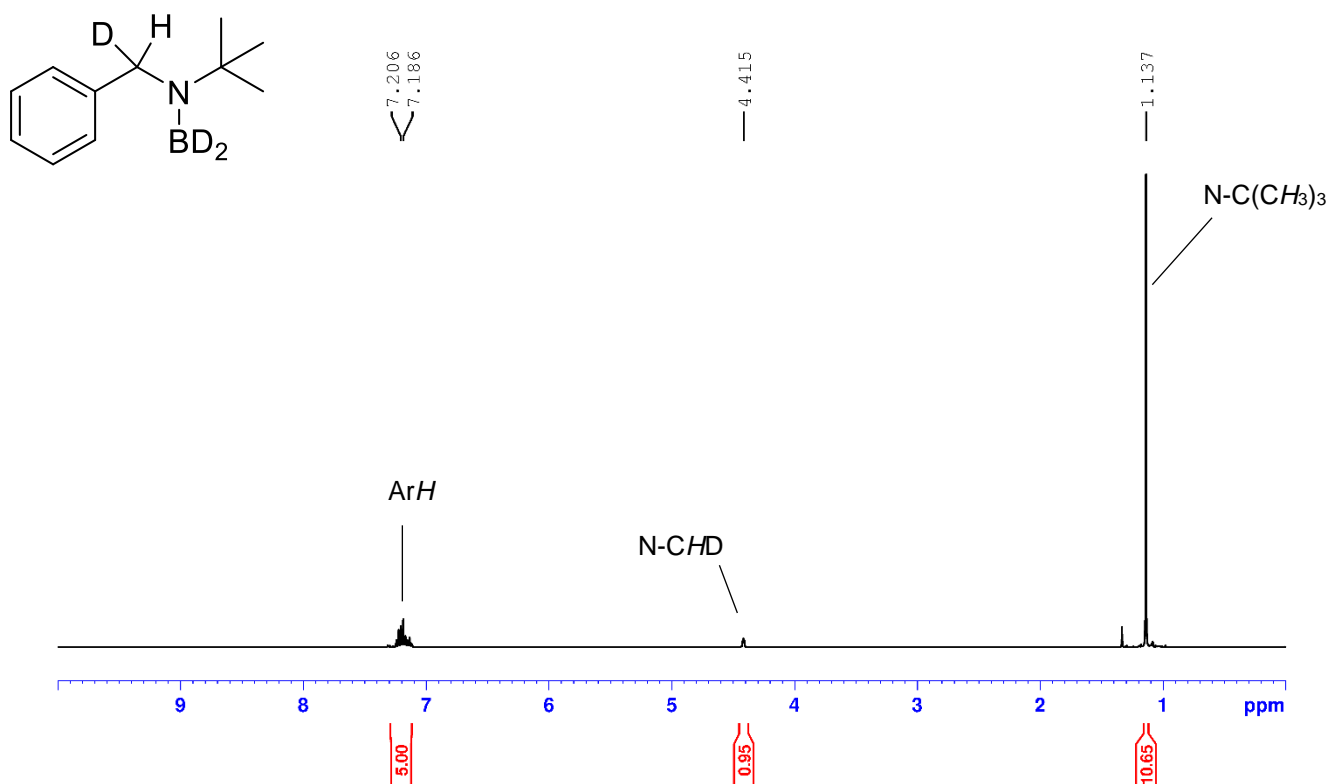

Figure S10.  $^1\text{H}$  NMR spectrum for **3c-d<sub>3</sub>**.

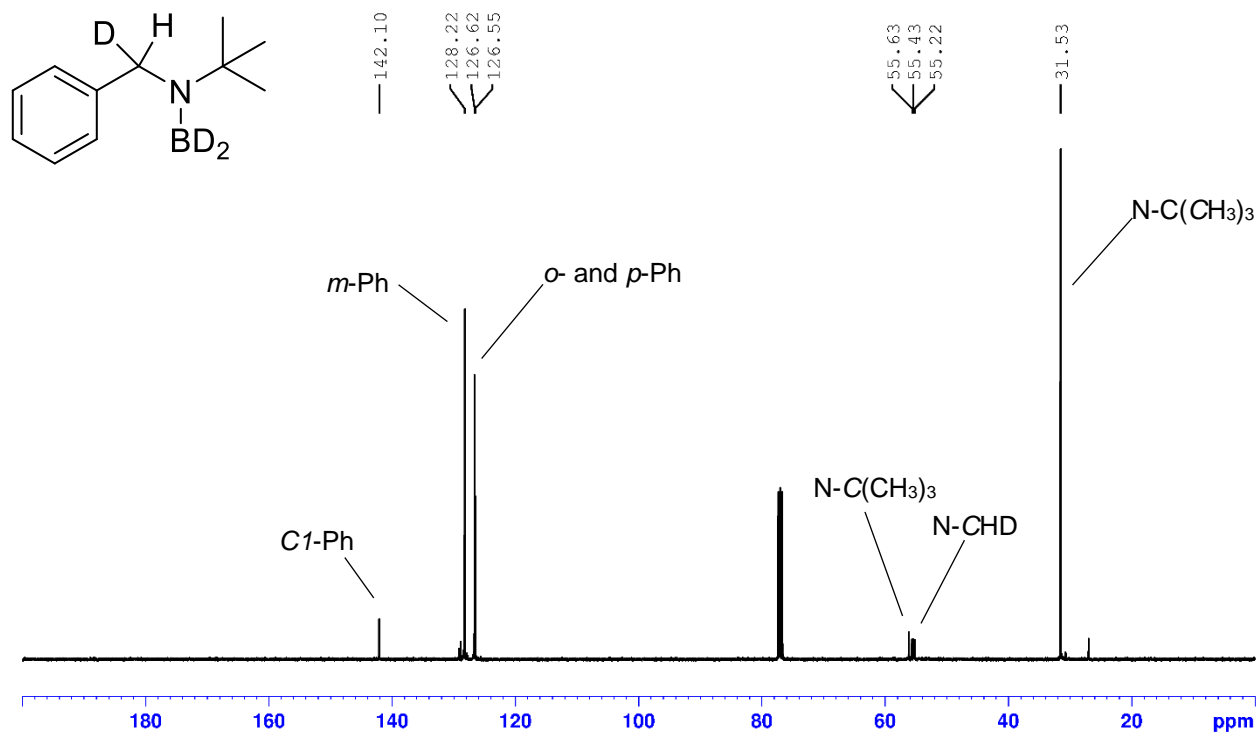

Figure S11. <sup>13</sup>C{<sup>1</sup>H} NMR spectrum for **3c-d<sub>3</sub>**.

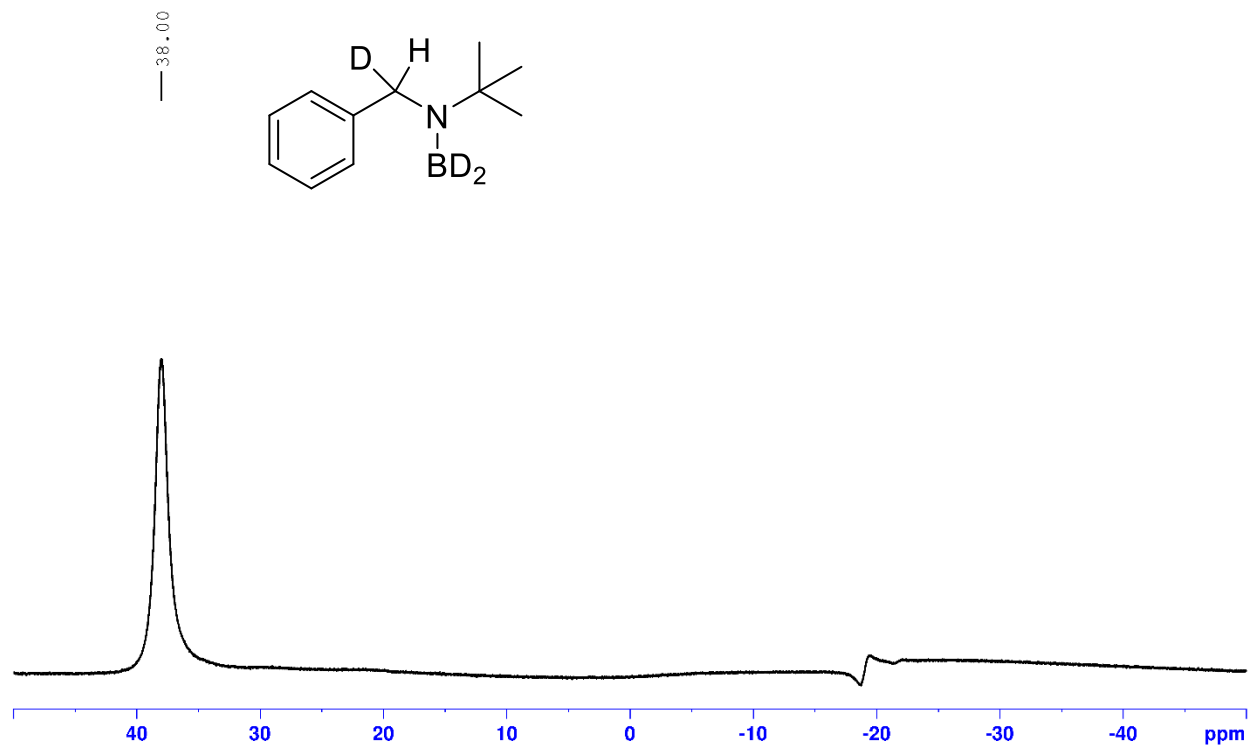

Figure S12. <sup>11</sup>B NMR spectrum for **3c-d<sub>3</sub>**.

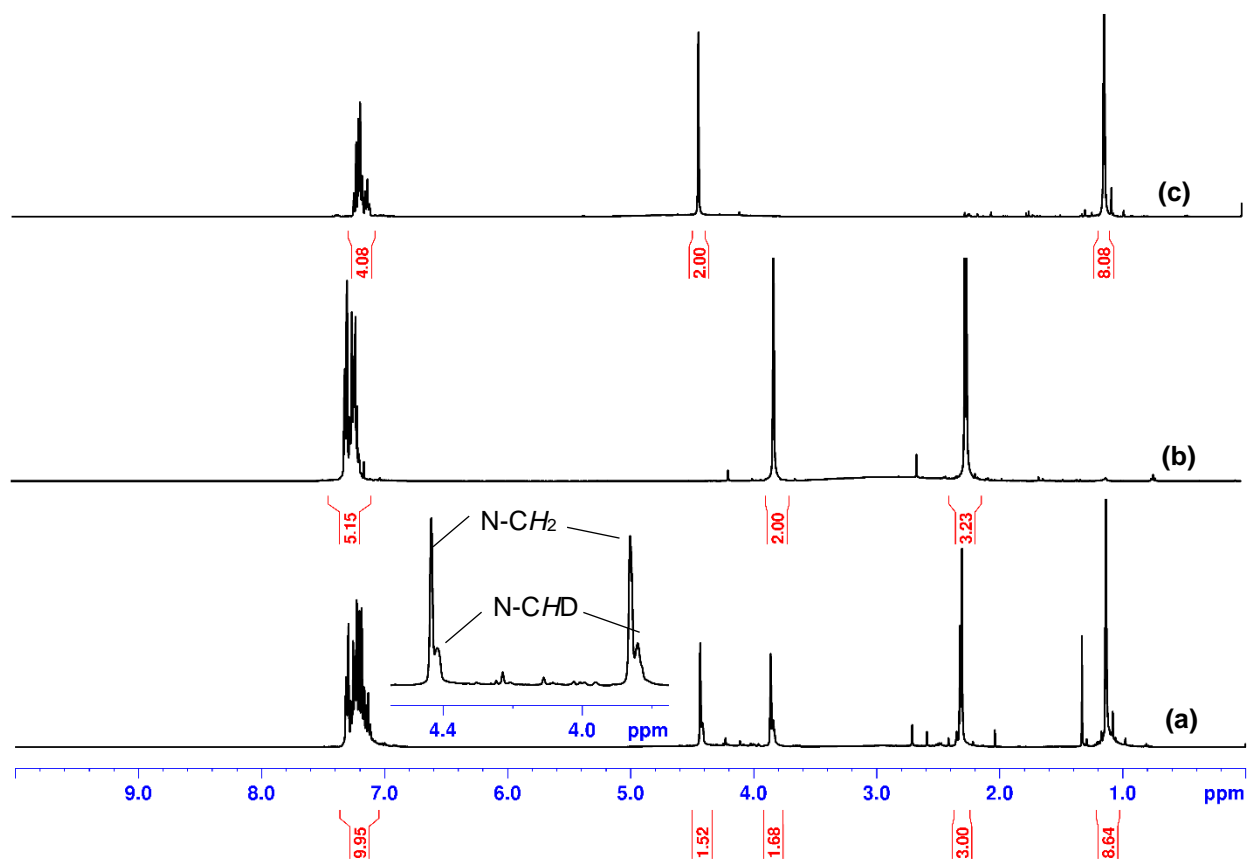

Figure S13: Overlay of the reaction between **2b** and **2c-d<sub>3</sub>** and (a) with **3b** (b) and **3c** (c).

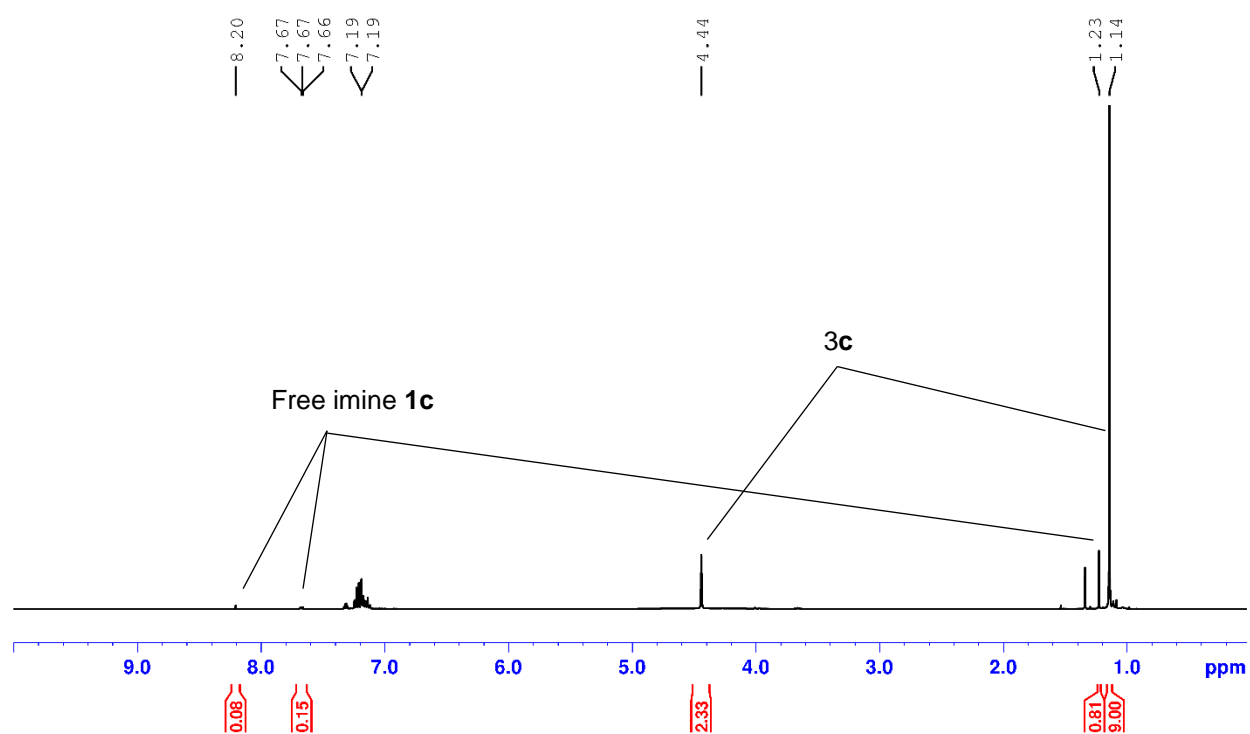

Figure S14.  $^1\text{H}$  NMR of conversion of **2c** to **3c** under "open system".



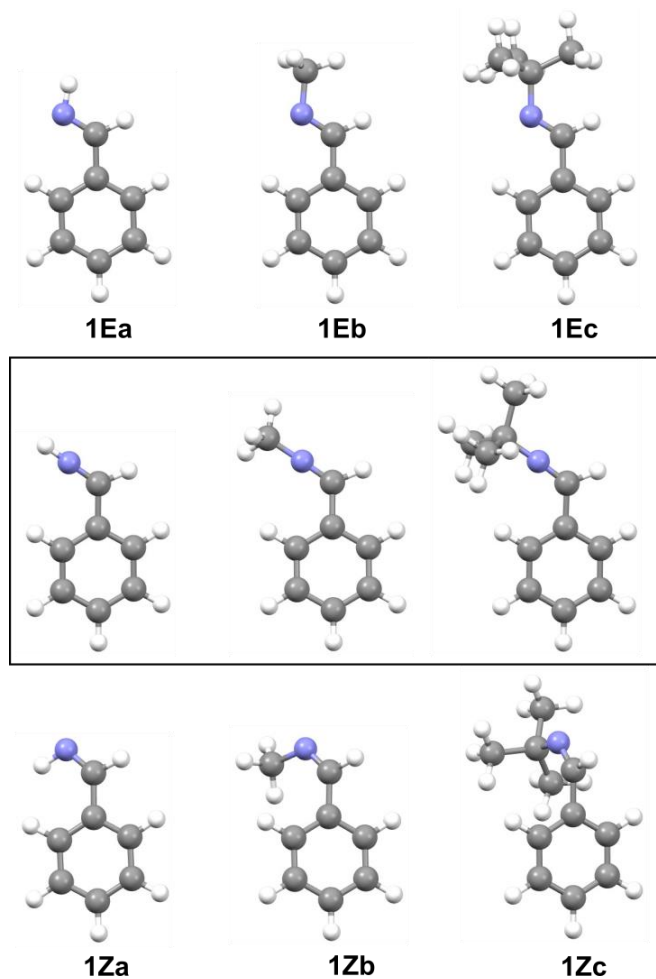

Figure S15. Studied imines (**1E**, top), transition states for alkyl group rotation (middle), and the corresponding rotamers (**1Z**, bottom).

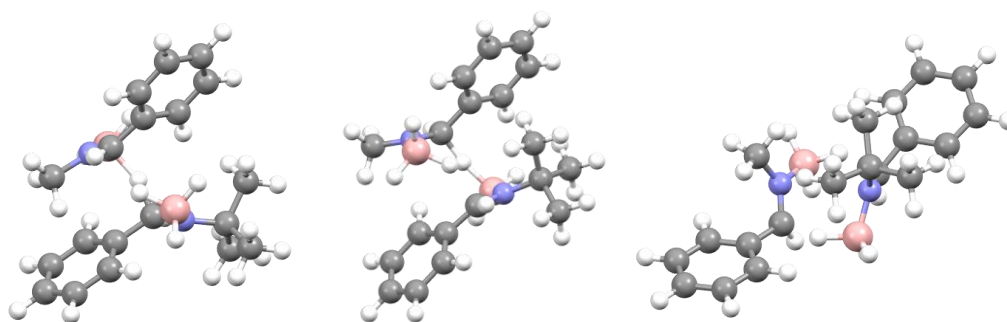

Figure S16. Two transition states for a reaction between **2Eb** and **2Ec** (left and middle) and a transition state for a reaction between **2Zb** and **2Zc** (right).
